# Supplementary material for: Establishment of a new dispersive solid phase microextraction method with a green adsorbent CaAl-LDH hybrid with g-C 3 N 4 for the determination of Pb 2+ in instant cup noodles and environmental samples
Source: Royal Society of Chemistry journal article supplement (doi:10.1039/d5ay01871d), 2025-12-22

**Supplementary file:**

**Establishment of the new dispersive solid Phase microextraction (DSP- $\mu$ E) method with novel adsorbent CaAl-LDH hybrid with g-C<sub>3</sub>N<sub>4</sub> utilised for the determination of Pb<sup>2+</sup> in food and environmental samples**

Muhammad Balal Arain <sup>a,b,\*</sup>, Abdul Niaz <sup>a, c</sup>, Mustafa Soylak <sup>a,d,e,\*</sup>

<sup>a</sup> Department of Chemistry, Faculty of Sciences, Erciyes University, 38039 Kayseri, Türkiye

<sup>b</sup> Department of Chemistry, University of Karachi, 75270, Karachi, Pakistan.

<sup>c</sup> Department of Chemistry, University of Science & Technology, 28100, Bannu, KPK, Pakistan

<sup>d</sup> Technology Research & Application Center (ERU-TAUM), Erciyes University, 38039 Kayseri, Türkiye

<sup>e</sup> Turkish Academy of Sciences (TUBA), Çankaya, Ankara, Türkiye

\*Corresponding author E-mail: [soylak@erciyes.edu.tr](mailto:soylak@erciyes.edu.tr), [balal\\_ku2004@yahoo.com](mailto:balal_ku2004@yahoo.com)

**Supplementary Table S1.** Matrix ions effect on developed DSP-μE (N=3).

| <b>Ion</b>                         | <b>Added as</b>                                      | <b>Concentration (mg/L)</b> | <b>Recovery, %</b> |
|------------------------------------|------------------------------------------------------|-----------------------------|--------------------|
| <b>CO<sub>3</sub><sup>2-</sup></b> | Na <sub>2</sub> CO <sub>3</sub>                      | 2500                        | 97 ± 9             |
| <b>NO<sub>3</sub><sup>-</sup></b>  | NaNO <sub>3</sub>                                    | 3500                        | 98 ± 9             |
| <b>Cl<sup>-</sup></b>              | NaCl                                                 | 2500                        | 101± 9             |
| <b>Na<sup>+</sup></b>              | NaCl                                                 | 4000                        | 99 ± 1             |
| <b>K<sup>+</sup></b>               | KCl                                                  | 4000                        | 101 ± 1            |
| <b>Mg<sup>2+</sup></b>             | Mg(NO <sub>3</sub> ) <sub>2</sub> ·6H <sub>2</sub> O | 2.5                         | 98 ± 8             |
| <b>Cu<sup>2+</sup></b>             | Cu(NO <sub>3</sub> ) <sub>2</sub> ·6H <sub>2</sub> O | 2.5                         | 97 ± 6             |
| <b>Mn<sup>2+</sup></b>             | Mn(NO <sub>3</sub> ) <sub>2</sub> ·6H <sub>2</sub> O | 2.5                         | 101 ± 8            |
| <b>Zn<sup>2+</sup></b>             | Zn(NO <sub>3</sub> ) <sub>2</sub> ·6H <sub>2</sub> O | 2.5                         | 99 ± 8             |
| <b>Ni<sup>2+</sup></b>             | Ni(NO <sub>3</sub> ) <sub>2</sub> ·6H <sub>2</sub> O | 2.5                         | 97 ± 7             |
| <b>Cd<sup>2+</sup></b>             | Cd(NO <sub>3</sub> ) <sub>2</sub> ·6H <sub>2</sub> O | 2.5                         | 101 ± 5            |
| <b>Fe<sup>3+</sup></b>             | Fe(NO <sub>3</sub> ) <sub>3</sub> ·6H <sub>2</sub> O | 2.5                         | 99 ± 8             |

<sup>a</sup> Mean ± Standard deviation

**Supplementary Fig. S1. Determination of the point of zero charge (PZC) of the adsorbent**

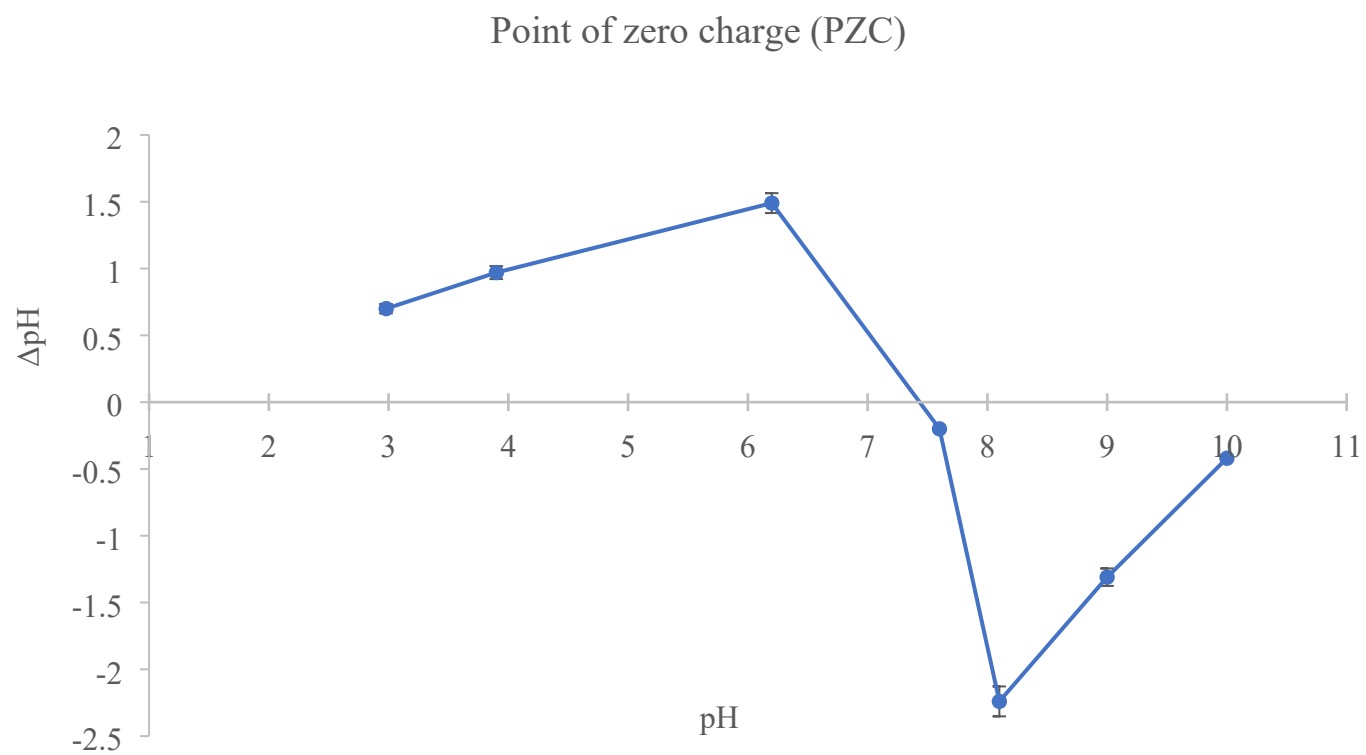

Supplement: d5ay01871d1.pdf [file d5ay01871d1.pdf]
